# Supplementary material for: GABPA-dependent down-regulation of DICER1 in follicular thyroid tumours
Source: PubMed Central journal article supplement (PMC7159166; doi:10.1530/erc-19-0446), 2020-03-11
Supplement: supplementary_figure_1.pdf [file supplementary_figure_1.pdf]

**A**

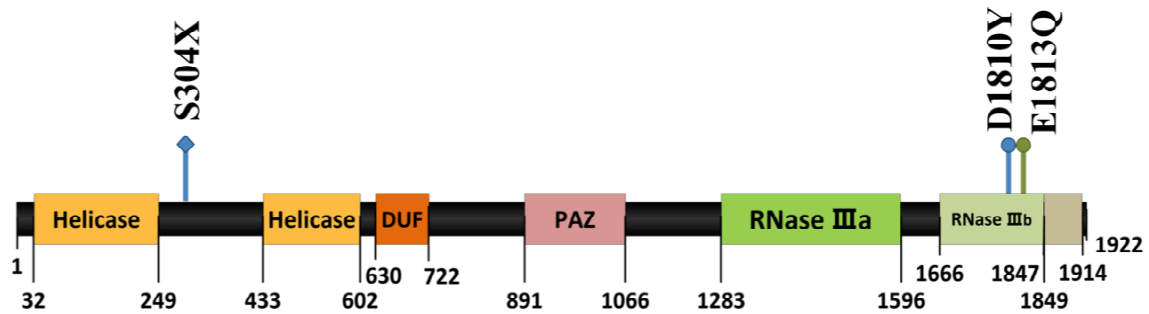

**B**

|                    | Codon |             |      |      |             |             |      |
|--------------------|-------|-------------|------|------|-------------|-------------|------|
|                    | 290   | 304         | 1705 | 1709 | 1810        | 1813        | 1814 |
| <b>Tumour type</b> |       |             |      |      |             |             |      |
| FTC                | 0/61  | <b>1/61</b> | 0/53 | 0/53 | <b>1/61</b> | <b>1/61</b> | 0/61 |
| HuCC               | 0/15  | 0/15        | 0/13 | 0/13 | 0/15        | 0/15        | 0/15 |
| FTA                | 0/43  | 0/43        | 0/43 | 0/43 | 0/43        | 0/43        | 0/43 |
| FT-UMP             | 0/7   | 0/7         | 0/7  | 0/7  | 0/7         | 0/7         | 0/7  |

FTC, follicular thyroid carcinoma

HuCC, Hürthle cell carcinoma

FTA, follicular thyroid adenoma

FT-UMP, follicular tumour of uncertain malignant potential

**Supplementary Figure 1.** (A) A schematic illustration of *DICER1* domains with three mutations identified in two FTC patients. The blue and green lines refer to two separate patients. (B) Results from the *DICER1* hotspot mutational screening in follicular thyroid tumours.
