# Supplementary material for: GABPA-dependent down-regulation of DICER1 in follicular thyroid tumours
Source: PubMed Central journal article supplement (PMC7159166; doi:10.1530/erc-19-0446), 2020-03-11
Supplement: supplementary_figure_2.pdf [file supplementary_figure_2.pdf]

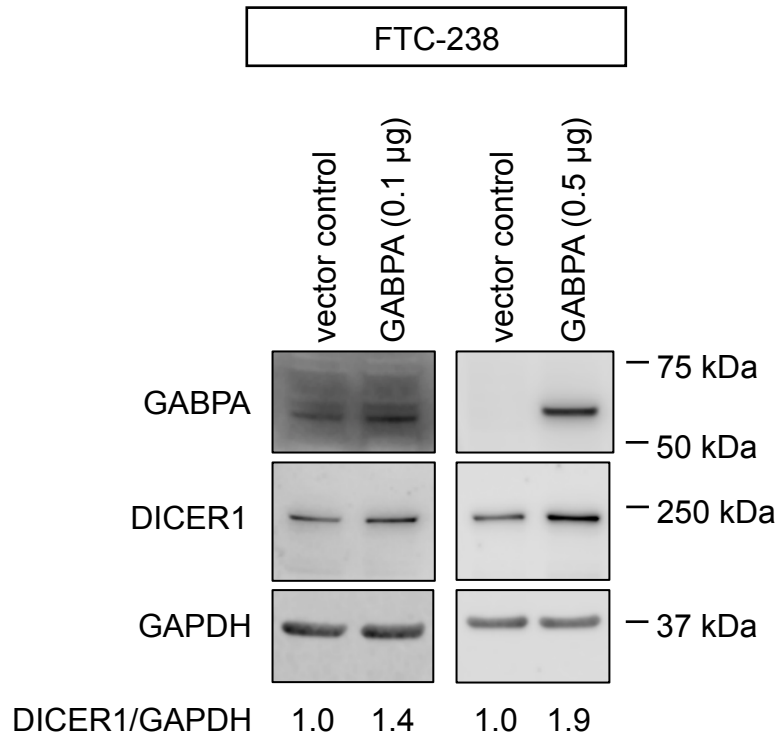

**Supplementary Figure 2.** GABPA over-expression increases DICER1 protein expression in FTC-238 cells. The DICER1/GAPDH quote denotes the ECL signal intensity quote between these proteins relative to vector control. Size ladder is indicated on the right of the blots.
