# Supplementary material for: GABPA-dependent down-regulation of DICER1 in follicular thyroid tumours
Source: PubMed Central journal article supplement (PMC7159166; doi:10.1530/erc-19-0446), 2020-03-11
Supplement: supplementary_figure_3.pdf [file supplementary_figure_3.pdf]

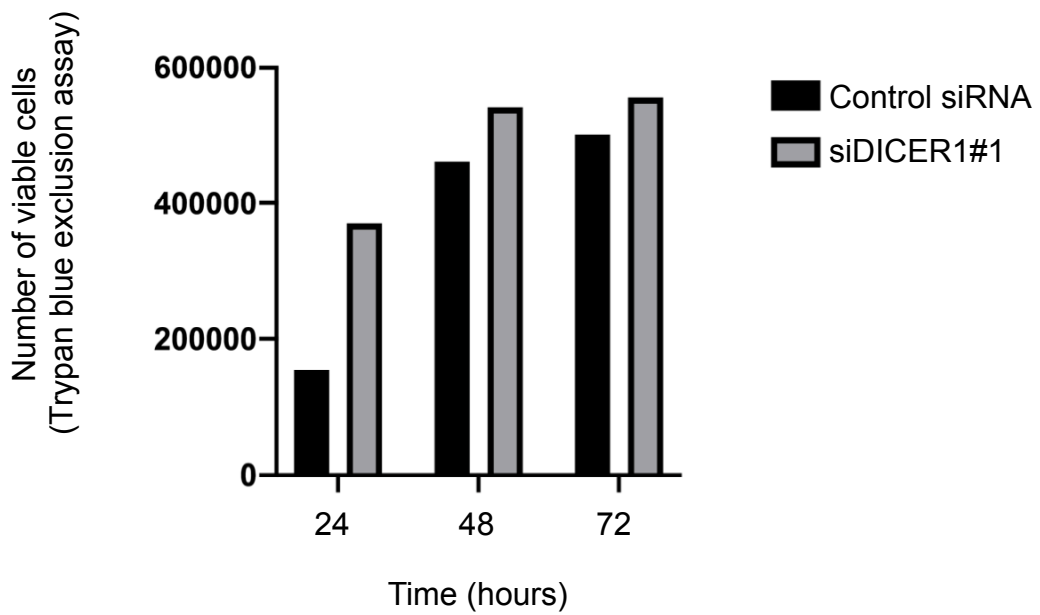

**Supplementary Figure 3.** Evaluation of the effect of *DICER1* depletion on cell growth in the FTC 238 cell line using trypan blue exclusion assay. An increase in cell number was observed after *DICER1* depletion at three different time points.
