# Supplementary material for: GABPA-dependent down-regulation of DICER1 in follicular thyroid tumours
Source: PubMed Central journal article supplement (PMC7159166; doi:10.1530/erc-19-0446), 2020-03-11
Supplement: supplementary_figure_4.pdf [file supplementary_figure_4.pdf]

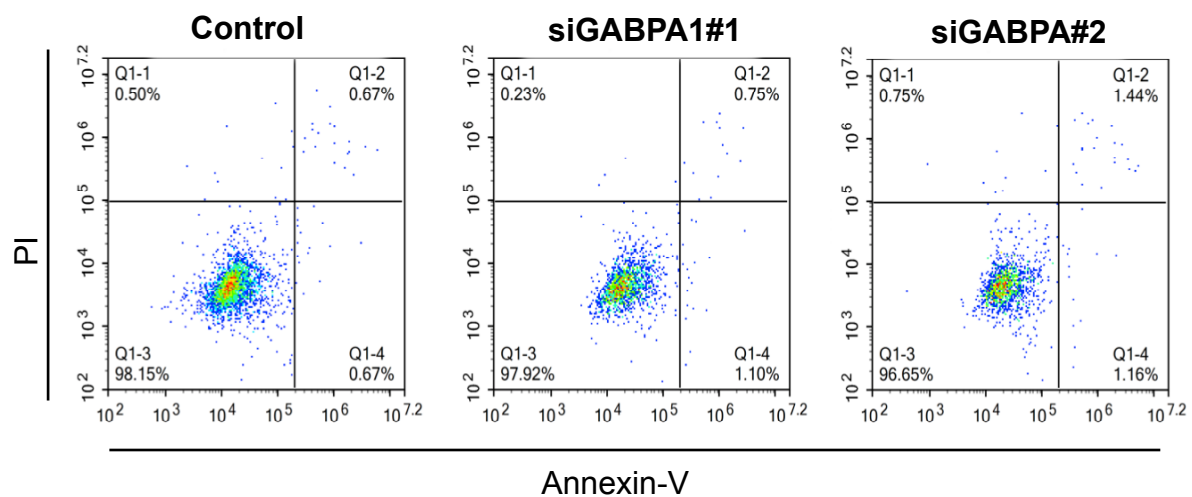

**Supplementary Figure 4.** Evaluation of the effect of GABPA depletion on apoptosis in FTC-238 cells. Representative flow cytometric images of FTC-238 cells stained with annexin V and propidium iodide (PI). Early apoptosis is represented by annexin V<sup>+</sup>/PI<sup>-</sup> (lower right quadrant), and late apoptosis is indicated by annexin V<sup>+</sup>/PI<sup>+</sup> (upper right quadrant).
