# Supplementary material for: GABPA-dependent down-regulation of DICER1 in follicular thyroid tumours
Source: PubMed Central journal article supplement (PMC7159166; doi:10.1530/erc-19-0446), 2020-03-11
Supplement: supplementary_table_1.pdf [file supplementary_table_1.pdf]

---

**Supplementary Table 1. Primers and siRNA sequences**

---

**siRNA**

|            |                                 |
|------------|---------------------------------|
| siGABPA#1  | 5'-GGAGCUGAUAGAAAUUGAGAUUGAU-3' |
| siGABPA#2  | 5'-GCAGAGUGCACAGAAGAAAGCAUUG-3' |
| siDICER1#1 | 5'-GAGUAAUGCUGAAACUGCAACUGAC-3' |
| siDICER1#2 | N/A                             |

**mRNA expression**

|                         |                                |
|-------------------------|--------------------------------|
| <i>GABPA</i> primer F   | 5'- AAGAACGCCTTGGGATACCCT-3'   |
| <i>GABPA</i> primer R   | 5'- GTGAGGTCTATATCGGTCATGCT-3' |
| <i>DICER1</i> primer F  | 5'-CCTAGACCACCCCTATCGAGA-3'    |
| <i>DICER1</i> primer R  | 5'-CAGGTCAGTTGCAGTTTCAGCA-3'   |
| <i>β-actin</i> primer F | 5'-GCGGGAAATCGTGCGTGACAT -3'   |
| <i>β-actin</i> primer R | 5'-TGGCGTACAGGTCTTTGCGGATG-3'  |

**Sanger sequencing**

|                          |                                       |
|--------------------------|---------------------------------------|
| Codon 290 primer F       | 5'-AAGACCTTAACTAAAATGCAAAGAAAAGAGC-3' |
| Codon 290 primer R       | 5'-TGGTGGATTGTGGACCATTTACTG-3'        |
| Codon 304 primer F       | 5'-ACACCAGGGTCCCAGAACTA-3'            |
| Codon 304 primer R       | 5'-GAGCCATTTGAGAACAACCTGAAATCC-3'     |
| Codon 1705&1709 primer F | 5'-CTTGTGCACAAGCTTACGGTTCCA-3'        |
| Codon 1705&1709 primer R | 5'-CAGCGATGCAAAGATGGTGTGTTGT-3'       |
| Codon 1810-1814 primer F | 5'-TCTTTGTGAACTTTTCCCCTTTGA-3'        |
| Codon 1810-1814 primer R | 5'-TGGTATTTCCCCCCTTACTAAAGAA-3'       |

**ChIP - PCR and sequencing**

|                                 |                             |
|---------------------------------|-----------------------------|
| <i>DICER1</i> promoter primer F | 5'-GGGCCACCATCTATTTCTCAT-3' |
| <i>DICER1</i> promoter primer R | 5'-GCCTGCGTTTCCTCGCGTT-3'   |

---
